# Supplementary material for: Controlled preparation of CdS nanoparticle arrays in amphiphilic perylene tetracarboxylic diimides: organization, electron-transfer and semiconducting properties
Source: Royal Society of Chemistry journal article supplement (doi:10.1039/c3ce41977k), 2013-11-28
Supplement: c3ce41977k.pdf [file c3ce41977k.pdf]

**Electronic Supplementary Information For:**

**Controlled Preparation of CdS Nanoparticle Arrays in Amphiphilic  
Perylene Tetracarboxylic Diimides: Organization, Electron-Transfer  
and Semiconducting Properties**

Jingang Song,<sup>a</sup> Qingwen Tian,<sup>a</sup> Jian Gao,<sup>a</sup> Haixia Wu,<sup>b</sup> Yanli Chen\*<sup>a</sup> and Xiyu Li\*<sup>b</sup>

<sup>a</sup> *Shandong Provincial Key Laboratory of Fluorine Chemistry and Chemical Materials,  
School of Chemistry and Chemical Engineering, University of Jinan, Jinan, 250022, China.*

<sup>b</sup> *Department of Chemistry, Shandong University, Jinan, 250100, China.*

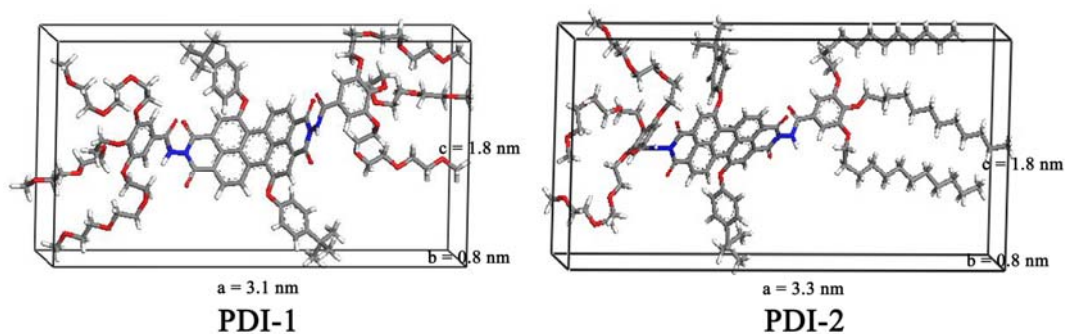

**Scheme S1.** The energy-optimized conformation of **PDI-1** (left) and **PDI-2** (right) obtained from DFT calculation (B3LYP/6-31G(d)).

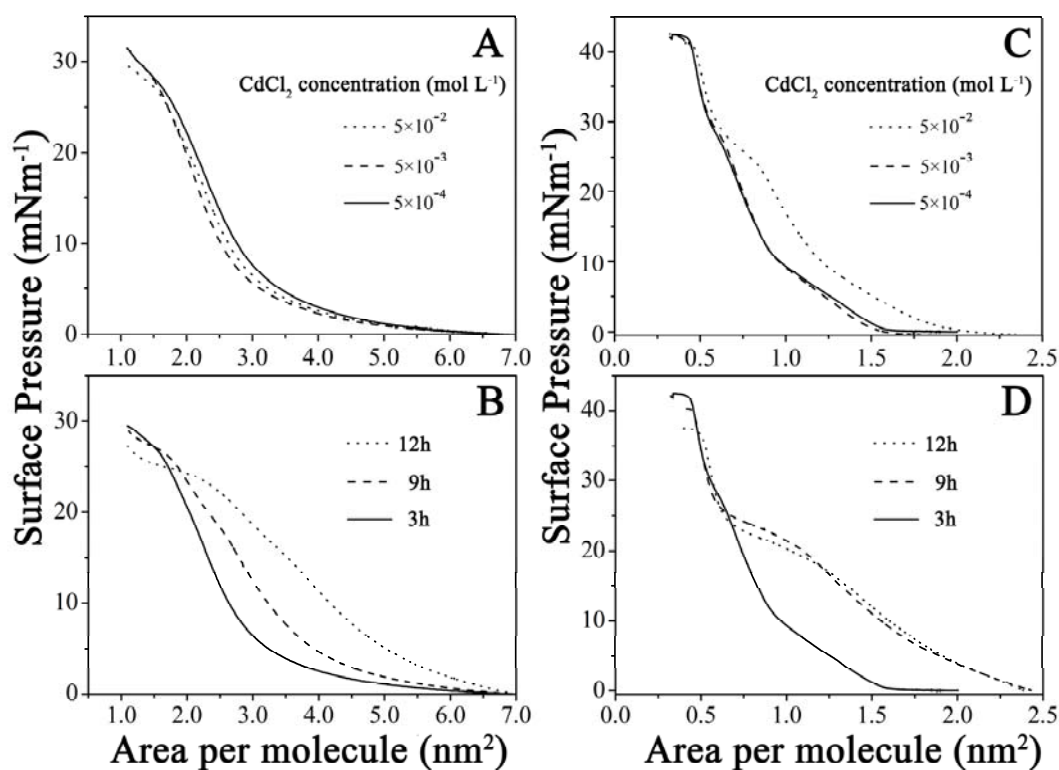

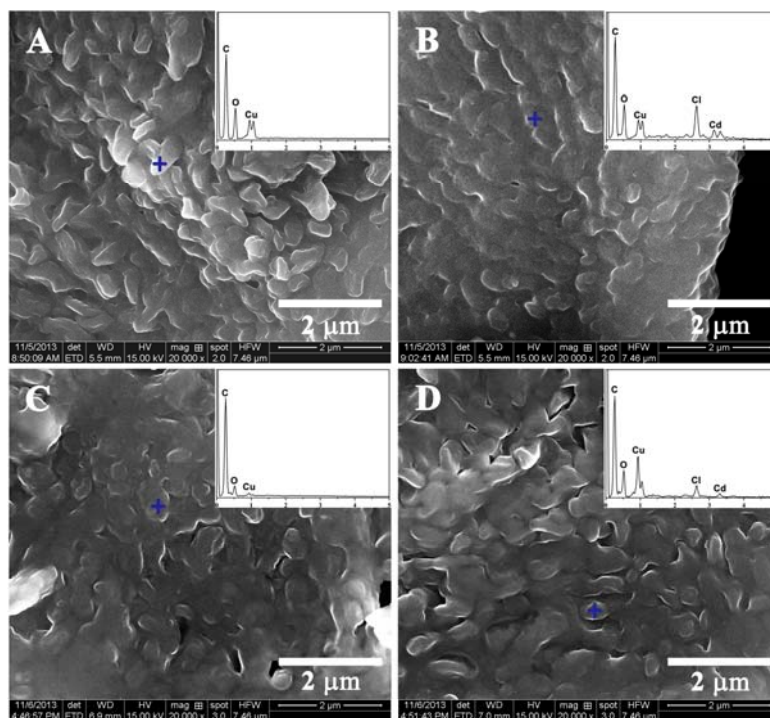

**Fig. S2.** SEM images of the Langmuir film of the **PDI-1** (top) and **PDI-2** (bottom) on the pure water surface (A and C) and CdCl<sub>2</sub> subphase surface (B and D). The inset of A-D shows the EDS pattern collected from the nanoparticle (cross mark) in the corresponding Langmuir films, respectively.

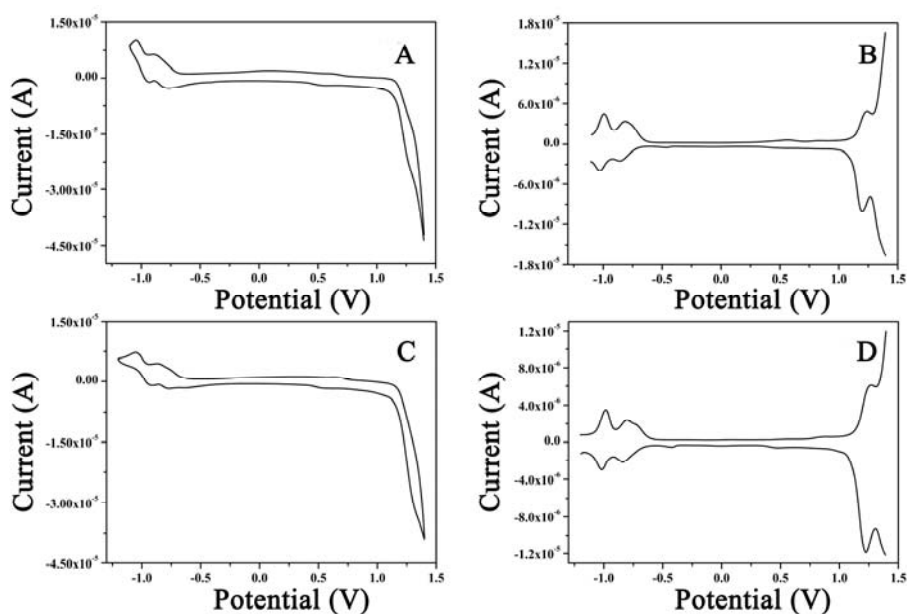

**Fig. S3.** Cyclic voltammogram (A and C) and differential pulse voltammogram (B and D) of **PDI-1** and **PDI-2**, respectively, in CH<sub>2</sub>Cl<sub>2</sub> containing 0.1 M [NBu<sub>4</sub>][ClO<sub>4</sub>] at a scan rate of 20 and 10 mV·S<sup>-1</sup>.

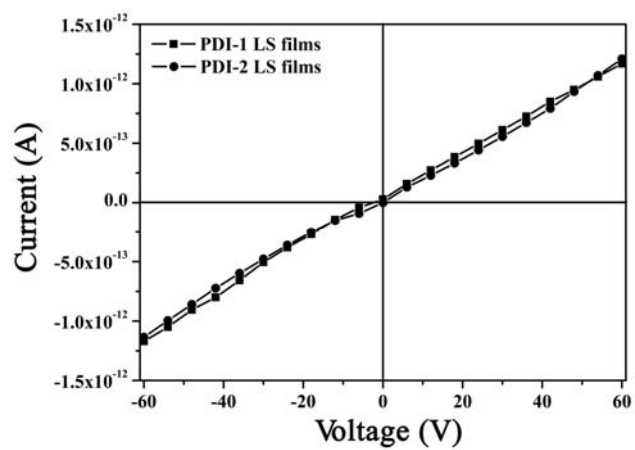

**Fig. S4.** *I-V* curves of the **PDI-1** and **PDI-2** LS films.

**Table S1.** The experimental data of X-ray diffraction from **PDI** LS films and CdS/**PDI** composite films.

| films                             | component    | 2θ / degree | d /nm | hkl or attribution                                           |
|-----------------------------------|--------------|-------------|-------|--------------------------------------------------------------|
| <b>PDI-1</b> LS films             | <b>PDI-1</b> | 5.72        | 1.55  | (001)                                                        |
|                                   |              | 28.94       | 0.31  | $\pi$ - $\pi$ interaction                                    |
|                                   | <b>PDI-1</b> | 6.04        | 1.46  | (001)                                                        |
|                                   |              | 21.08       | 0.42  | liquid-like ordered packing of long alky chains              |
| CdS/ <b>PDI-1</b> composite films | CdS          | 28.94       | 0.31  | $\pi$ - $\pi$ interaction                                    |
|                                   |              | 24.86       | 0.358 | (100)                                                        |
|                                   |              | 26.45       | 0.357 | (002)                                                        |
|                                   |              | 28.22       | 0.316 | (101)                                                        |
|                                   |              | 43.78       | 0.207 | (110)                                                        |
|                                   |              | 51.70       | 0.177 | (112)                                                        |
|                                   |              | 3.02        | 2.92  | (001)                                                        |
|                                   |              | 6.02        | 1.47  | (002)                                                        |
| <b>PDI-2</b> LS films             | <b>PDI-2</b> | 21.32       | 0.42  | liquid-like ordered packing of long alky and/or alkyl chains |
|                                   |              | 28.06       | 0.31  | $\pi$ - $\pi$ interaction                                    |
|                                   | <b>PDI-2</b> | 4.20        | 2.10  | (001)                                                        |
|                                   |              | 21.08       | 0.42  | liquid-like ordered packing of long alky and/or alkyl chains |
| CdS/ <b>PDI-2</b> composite films | CdS          | 28.02       | 0.31  | $\pi$ - $\pi$ interaction                                    |
|                                   |              | 24.86       | 0.358 | (100)                                                        |
|                                   |              | 26.45       | 0.357 | (002)                                                        |
|                                   |              | 28.22       | 0.316 | (101)                                                        |
|                                   |              | 43.70       | 0.207 | (110)                                                        |
|                                   |              | 52.04       | 0.176 | (112)                                                        |

**Table S2.** Half-wave redox potentials of **PDI-1** and **PDI-2** (V vs SCE) in CH<sub>2</sub>Cl<sub>2</sub> containing 0.1M TBAP and the HOMO, LUMO levels of **PDI**.

| Compound     | Oxd <sub>1</sub> (V) <sup>b</sup> | Red <sub>1</sub> (V) <sup>b</sup> | Red <sub>2</sub> (V) <sup>b</sup> | E <sub>HOMO</sub> (eV) <sup>c</sup> | E <sub>HOMO</sub> (eV) <sup>c</sup> | $\Delta E^{\circ}_{1/2}$ (V) <sup>a</sup> |
|--------------|-----------------------------------|-----------------------------------|-----------------------------------|-------------------------------------|-------------------------------------|-------------------------------------------|
| <b>PDI-1</b> | 1.52                              | -0.54                             | -0.71                             | -5.96                               | -3.90                               | 2.05                                      |
| <b>PDI-2</b> | 1.54                              | -0.53                             | -0.70                             | -5.98                               | -3.95                               | 2.07                                      |

<sup>a</sup>  $\Delta E^{\circ}_{1/2} = \text{Oxd}_1 - \text{Red}_1$ , i.e. the HOMO-LUMO gap of corresponding molecule.

<sup>b</sup> Recorded by DPV.

<sup>c</sup> Calculated from empirical formula<sup>1</sup>: HOMO = -(Oxd<sub>1</sub>+4.44 eV).

<sup>d</sup> LUMO = -(Red<sub>1</sub>+4.44 eV).

**Table S3.** The experimental data of fluorescence decay ( $\tau$ ) from **PDI** LS films and CdS/**PDI** composite films.

| $\tau$ /ns   | pure LS films | CdS/ <b>PDI</b> composite films |                        |                |
|--------------|---------------|---------------------------------|------------------------|----------------|
|              |               | 40 nm                           | 60 nm                  | 80 nm          |
| <b>PDI-1</b> | 2.91          | 1.20 (88.76%)                   | 1.30 (86.03%)          | 1.57 (89.87%)  |
|              |               | 11.24 (11.24%)                  | 10.99 (13.97%)         | 10.10 (10.13%) |
| <b>PDI-2</b> | 3.50          | 20 nm<br>1.40 (91.98%)          | 30 nm<br>2.50 (82.19%) |                |
|              |               | 17.30 (8.02%)                   | 10.20 (17.81%)         |                |

1. S. Vajiravelu, L. Ramunas, G. J. Vidas, G. Valentas,; J. Vygintas, S. Valiyaveetil. *J. Mater. Chem.* 2009, **19**, 4268.
